# Supplementary material for: Cellular morphology of leg musculature in the water bear Hypsibius exemplaris (Tardigrada) unravels serial homologies
Source: PubMed Central journal article supplement (PMC6837179; doi:10.1098/rsos.191159), 2019-10-16

Myosin blot Blotted gel

~250

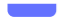

~130

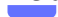

~100

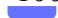

~70

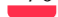

~55

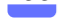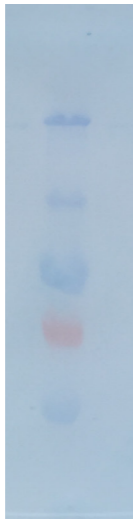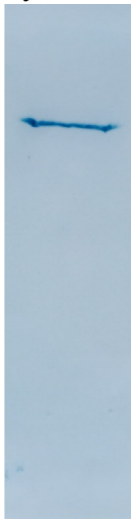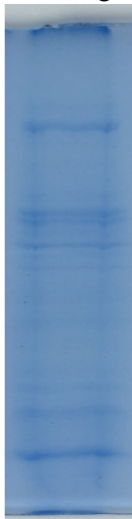

Supplement: rsos191159supp1.pdf [file rsos191159supp1.pdf]
