# Supplementary material for: Cellular morphology of leg musculature in the water bear Hypsibius exemplaris (Tardigrada) unravels serial homologies
Source: PubMed Central journal article supplement (PMC6837179; doi:10.1098/rsos.191159), 2019-10-16
Supplement: rsos191159supp5.pdf [file rsos191159supp5.pdf]

**Supplementary Table 1.** Leg I. Comparison of leg muscle terminology from the literature and this study for *Hypsibius exemplaris* and closely related species. Note that labels from Müller [10] are compiled from several species. Labels are taken directly from references (from top to bottom): Müller [10] (*H. convergens*, *Ramazottius oberhaueseri*, *Macrobiotus hufelandi*), Schmidt-Rhaesa & Kulesa [11] (*Hypsibius* sp.), Smith & Jockusch [15] (*H. exemplaris*), Marchioro *et al.* [14] (*Acutuncus antarcticus*), this study (*H. exemplaris*). Question marks indicate ambiguous or missing data. See main manuscript for references.

|                                                                                     |                                                                                     |                                                                                    |                                                                                     |                                                                                     |                                                                                     |
|-------------------------------------------------------------------------------------|-------------------------------------------------------------------------------------|------------------------------------------------------------------------------------|-------------------------------------------------------------------------------------|-------------------------------------------------------------------------------------|-------------------------------------------------------------------------------------|
| 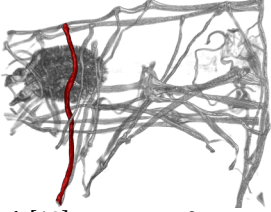   |    |  |  |  |  |
| Ref. [10] $\delta$                                                                  | 3                                                                                   | $\epsilon$                                                                         | $\epsilon$                                                                          | 4, 5                                                                                | 6, 7a                                                                               |
| Ref. [11]      d1                                                                   | e1                                                                                  | e2                                                                                 | e3                                                                                  | f1, g1                                                                              | h1, i1                                                                              |
| Ref. [15]      d1                                                                   | e1                                                                                  | f*1                                                                                | f*2                                                                                 | f1, g1                                                                              | h1, i1                                                                              |
| Ref. [14] $\delta$ -LI2                                                             | 2-LI5                                                                               | $\epsilon$ -LI3                                                                    | $\epsilon$ -LI3                                                                     | 5-LI1, 4-LI4                                                                        | 6-LIa, 7-LIa                                                                        |
| This study    iM1                                                                   | iM2                                                                                 | iM3                                                                                | iM4                                                                                 | iM5                                                                                 | iM6                                                                                 |
|    |    |  |  |  |  |
| Ref. [10]      l                                                                    | d                                                                                   | A?                                                                                 | A?                                                                                  | A                                                                                   | B                                                                                   |
| Ref. [11]      t1                                                                   | $\tau$ 1                                                                            | li-a                                                                               | li                                                                                  | ?                                                                                   | 2i                                                                                  |
| Ref. [15]      t1                                                                   | $\tau$ 1                                                                            | 1*                                                                                 | li                                                                                  | ?                                                                                   | 2i                                                                                  |
| Ref. [14]      l-LIa + LIa-LIb                                                      | d-LIb                                                                               | A-LIc                                                                              | A-LIc                                                                               | A-LId                                                                               | B-LIb                                                                               |
| This study    iM7                                                                   | iM8                                                                                 | iM9                                                                                | iM10                                                                                | iM11                                                                                | iM12                                                                                |
|  |  |                                                                                    |                                                                                     |                                                                                     |                                                                                     |
| Ref. [10]      ?                                                                    | ?                                                                                   |                                                                                    |                                                                                     |                                                                                     |                                                                                     |
| Ref. [11]      ?                                                                    | ?                                                                                   |                                                                                    |                                                                                     |                                                                                     |                                                                                     |
| Ref. [15]      ?                                                                    | sh                                                                                  |                                                                                    |                                                                                     |                                                                                     |                                                                                     |
| Ref. [14]      ?                                                                    | Llb (proximal point)                                                                |                                                                                    |                                                                                     |                                                                                     |                                                                                     |
| This study    iM13                                                                  | iM14                                                                                |                                                                                    |                                                                                     |                                                                                     |                                                                                     |

Table 1 (continued). Leg II.

|                                                                                   |                                                                                   |                                                                                    |                                                                                     |                                                                                     |                                                                                     |
|-----------------------------------------------------------------------------------|-----------------------------------------------------------------------------------|------------------------------------------------------------------------------------|-------------------------------------------------------------------------------------|-------------------------------------------------------------------------------------|-------------------------------------------------------------------------------------|
| 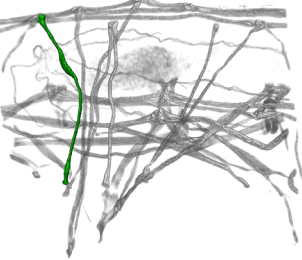 |  |  |  |  |  |
| Ref. [10] 7a                                                                      | 9b                                                                                | 9a                                                                                 | 7b, 9a                                                                              | 10, 11a                                                                             | i                                                                                   |
| Ref. [11] i2                                                                      | l2                                                                                | l3                                                                                 | k1/2, l1                                                                            | n1, o1                                                                              | t2                                                                                  |
| Ref. [15] i2                                                                      | l*1                                                                               | l*2                                                                                | k1, l1                                                                              | n1, o1                                                                              | t2                                                                                  |
| Ref. [14] 7-LII5                                                                  | 8-LII4                                                                            | 8-LII3                                                                             | 8-LII2, 9b-LII6                                                                     | 10-LIIa, 11-LIIa                                                                    | i-LIIa + LIIa-LIIb                                                                  |
| This study iiM2                                                                   | iiM3                                                                              | iiM4                                                                               | iiM5                                                                                | iiM6                                                                                | iiM7                                                                                |
|  |  |  |  |  |  |
| Ref. [10] e                                                                       | B                                                                                 | C                                                                                  | D                                                                                   | ?                                                                                   | ?                                                                                   |
| Ref. [11] $\tau$ 2                                                                | 2iii                                                                              | 3i                                                                                 | 4i                                                                                  | ?                                                                                   | ?                                                                                   |
| Ref. [15] $\tau$ 2                                                                | 2iii                                                                              | 3i                                                                                 | 4i                                                                                  | ?                                                                                   | sh                                                                                  |
| Ref. [14] e-LIIb                                                                  | B-?                                                                               | C-LII d                                                                            | D-LII b                                                                             | ?-LII e                                                                             | LII b (proximal point)                                                              |
| This study iiM8                                                                   | iiM9                                                                              | iiM11                                                                              | iiM12                                                                               | iiM13                                                                               | iiM14                                                                               |

Table 1 (continued). Leg III.

|                                                                                   |                                                                                   |                                                                                    |                                                                                     |                                                                                     |                                                                                     |          |
|-----------------------------------------------------------------------------------|-----------------------------------------------------------------------------------|------------------------------------------------------------------------------------|-------------------------------------------------------------------------------------|-------------------------------------------------------------------------------------|-------------------------------------------------------------------------------------|----------|
| 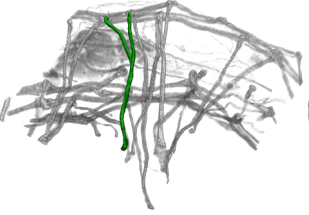 |  |  |  |  |  |          |
| Ref. [10]                                                                         | 11a, 11b                                                                          | 13b                                                                                | 13a                                                                                 | 11b, 13a                                                                            | $\Lambda, \eta, g_i$                                                                | f        |
| Ref. [11]                                                                         | o2, P?                                                                            | q2                                                                                 | q3                                                                                  | P?, q1                                                                              | s1, u1, t3                                                                          | $\tau_3$ |
| Ref. [15]                                                                         | o2, p2                                                                            | q*1                                                                                | q*2                                                                                 | q1                                                                                  | s1, u1, t3b                                                                         | $\tau_3$ |
| Ref. [14]                                                                         | 11-LIII2                                                                          | 13-LIII5                                                                           | 13-LIII3                                                                            | 12-LIII1, 13-LIII1                                                                  | $\Lambda, \eta, g_i$ -LIIa                                                          | f-LIIIb  |
| This study                                                                        | iiiM2                                                                             | iiiM3                                                                              | iiiM4                                                                               | iiiM5                                                                               | iiiM6                                                                               | iiiM8    |
|  |  |  |  |  |                                                                                     |          |
| Ref. [10]                                                                         | D                                                                                 | E                                                                                  | F                                                                                   | ?                                                                                   | ?                                                                                   | ?        |
| Ref. [11]                                                                         | 4iii                                                                              | 5i                                                                                 | 6i                                                                                  | ?                                                                                   | ?                                                                                   | ?        |
| Ref. [15]                                                                         | 4iii                                                                              | 5i                                                                                 | 6i                                                                                  | ?                                                                                   | sh                                                                                  |          |
| Ref. [14]                                                                         | D-?                                                                               | E-LIII d                                                                           | F-LIII b                                                                            | ?-LIII e                                                                            | LIII b (proximal point)                                                             |          |
| This study                                                                        | iiiM9                                                                             | iiiM11                                                                             | iiiM12                                                                              | iiiM13                                                                              | iiiM14                                                                              |          |

**Table 1 (continued).** Leg IV.

|                                                                                   |                                                                                   |                                                                                   |                                                                                     |                                                                                     |                                                                                     |                                                                                     |                     |
|-----------------------------------------------------------------------------------|-----------------------------------------------------------------------------------|-----------------------------------------------------------------------------------|-------------------------------------------------------------------------------------|-------------------------------------------------------------------------------------|-------------------------------------------------------------------------------------|-------------------------------------------------------------------------------------|---------------------|
| 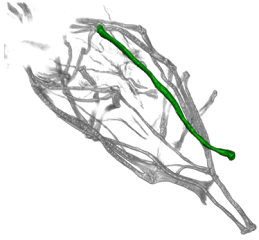 |  |  |  |  |  |  |                     |
| Ref. [10]                                                                         | $\chi-\eta$                                                                       | $\phi-g_2$                                                                        | $P_2-Q, \mu, \theta$                                                                | ?                                                                                   | O-f                                                                                 | $\phi-F$                                                                            | drawn, not labelled |
| Ref. [11]                                                                         | u2                                                                                | ?                                                                                 | w'1, w1, v1                                                                         | ?                                                                                   | 8a?                                                                                 | ?                                                                                   | 7iii                |
| Ref. [15]                                                                         | ?                                                                                 | ?                                                                                 | w1                                                                                  | ?                                                                                   | 8a                                                                                  | ?                                                                                   | 7iii                |
| Ref. [14]                                                                         | ?                                                                                 | ?-g <sub>2</sub>                                                                  | $P_2-\theta, \chi$                                                                  | $\chi-O$                                                                            | O-f                                                                                 | $\chi-G$                                                                            | $P_2-N$             |
| This study                                                                        | ivM2                                                                              | ivM4                                                                              | ivM5                                                                                | ivM6                                                                                | ivM8                                                                                | ivM9                                                                                | ivM11               |
|  |  |  |                                                                                     |                                                                                     |                                                                                     |                                                                                     |                     |
| Ref. [10]                                                                         | ?                                                                                 | P.-an                                                                             | P.-O                                                                                |                                                                                     |                                                                                     |                                                                                     |                     |
| Ref. [11]                                                                         | ?                                                                                 | ?                                                                                 | g                                                                                   |                                                                                     |                                                                                     |                                                                                     |                     |
| Ref. [15]                                                                         | ?                                                                                 | ?                                                                                 | sh                                                                                  |                                                                                     |                                                                                     |                                                                                     |                     |
| Ref. [14]                                                                         | O-N                                                                               | ?-P1                                                                              | P1-O                                                                                |                                                                                     |                                                                                     |                                                                                     |                     |
| This study                                                                        | ivM12                                                                             | ivM13                                                                             | ivM14                                                                               |                                                                                     |                                                                                     |                                                                                     |                     |
